# Supplementary material
Source: publisher figshare collection journal article supplement (https://acs.figshare.com/ndownloader/files/11399555)
Supplement: Supplementary file 1 [file 11399555]

# Double Coating for the Enhancement of the Performance in a $\text{MA}_{0.7}\text{FA}_{0.3}\text{PbBr}_3$ Photodetector

Hai Zhou,<sup>†,‡</sup> Zhaoning Song,<sup>†</sup> Changlei Wang,<sup>†</sup> Corey R. Grice,<sup>†</sup> Zehao Song,<sup>‡</sup> Dewei Zhao,<sup>†</sup> Hao Wang<sup>‡, \*</sup> and Yanfa Yan<sup>†, \*</sup>

<sup>†</sup>Department of Physics and Astronomy and Wright Center for Photovoltaics Innovation and Commercialization, The University of Toledo, Toledo, Ohio, 43606, USA.

<sup>‡</sup>Hubei Collaborative Innovation Center for Advanced Organic Chemical Materials, Hubei Key Laboratory of Ferro & Piezoelectric Materials and Devices, Faculty of Physics & Electronic Science, Hubei University, Wuhan, 430062, P.R. China.

\*Corresponding author: [nanoguy@126.com](mailto:nanoguy@126.com); [Yanfa.Yan@utoledo.edu](mailto:Yanfa.Yan@utoledo.edu)

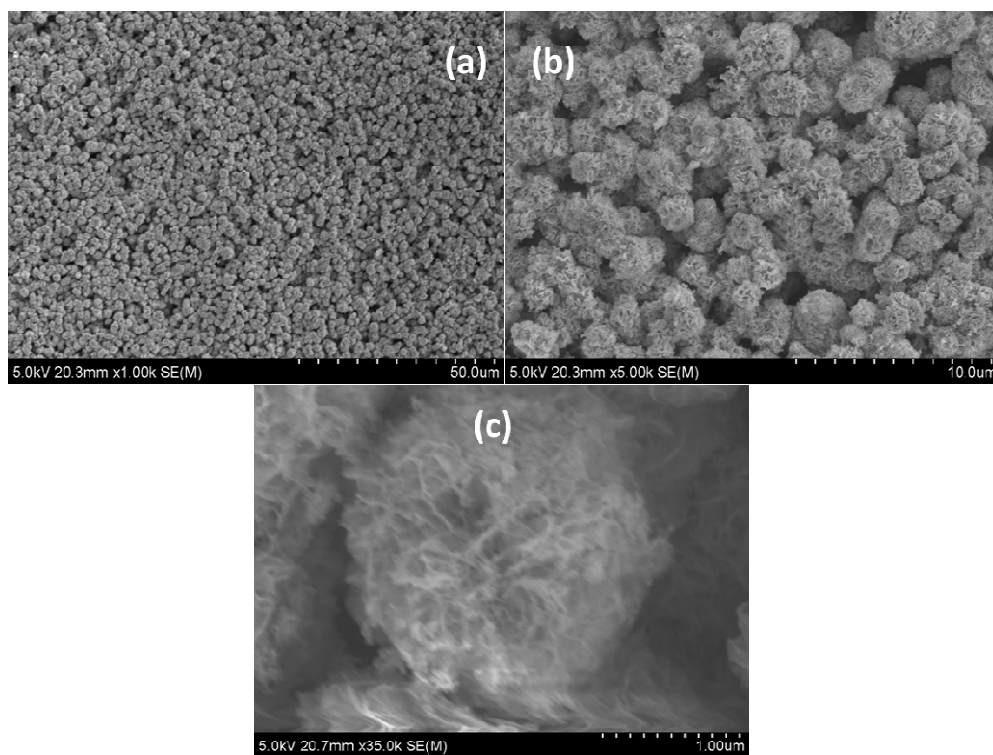

Figure S1 The SEM images of ZnO MP.

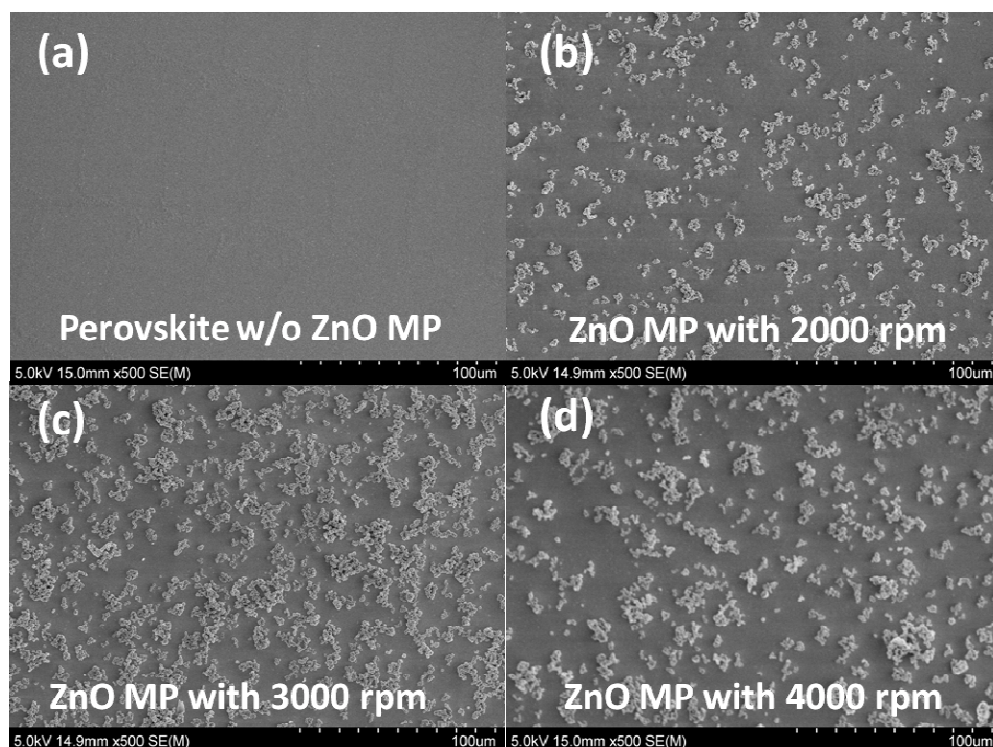

Figure S2 SEM images of perovskite without ZnO MP (a), with ZnO MP at (b) 2000 rpm, (c) 3000 rpm and (d) 4000 rpm.

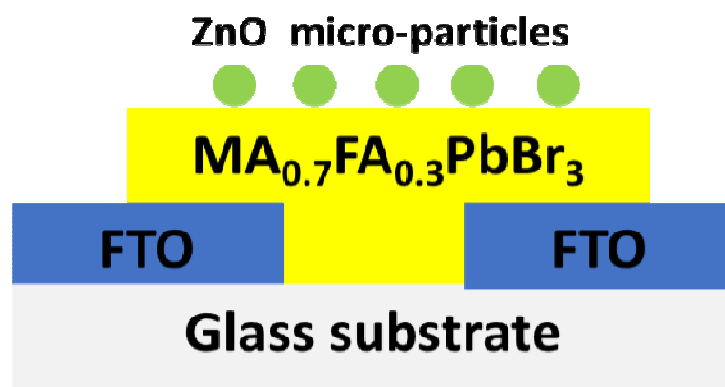

Figure S3 Schematic illustration of a perovskite PD coated by ZnO MPs.

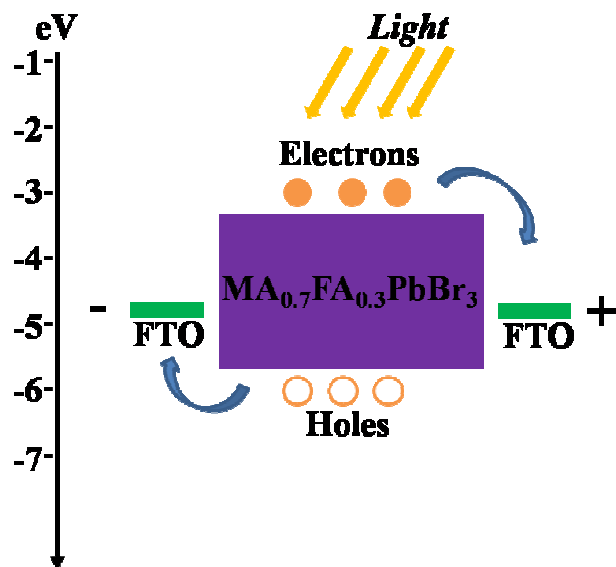

Figure S4 The band alignment of a perovskite PD.

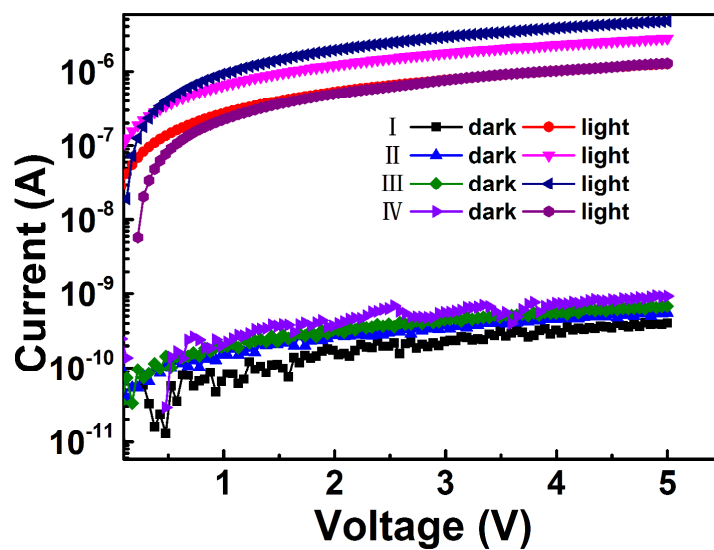

Figure S5 The  $I$ - $V$  characteristics in semilogarithmic coordinates of the devices modified by ZnO MP with various spin-coating rpm.

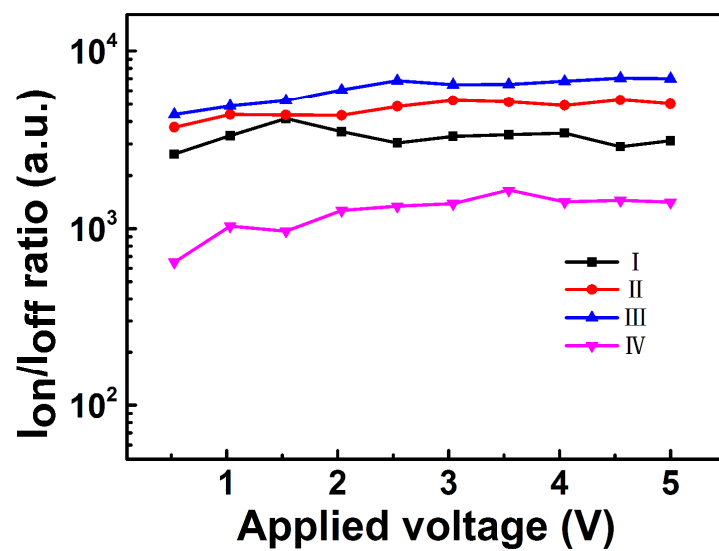

Figure S6  $I_{on}/I_{off}$  ratio curves of the devices modified by ZnO MP with various spin-coating rpm.

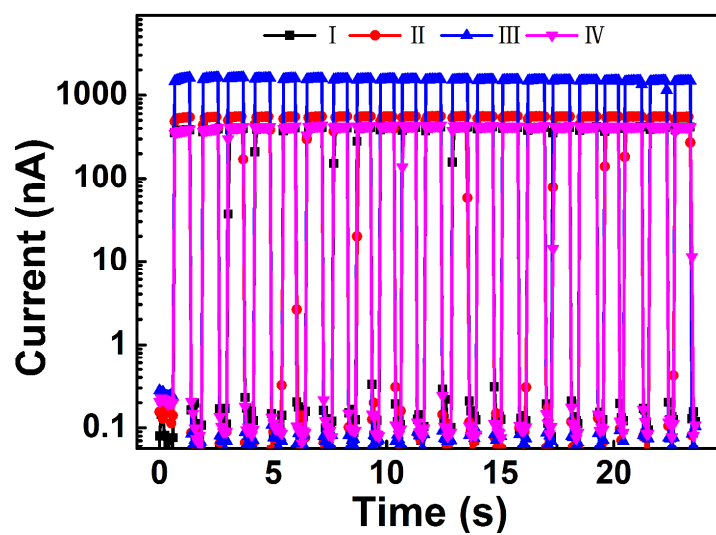

Figure S7 The dependence of photocurrent on operating time at 2 V.

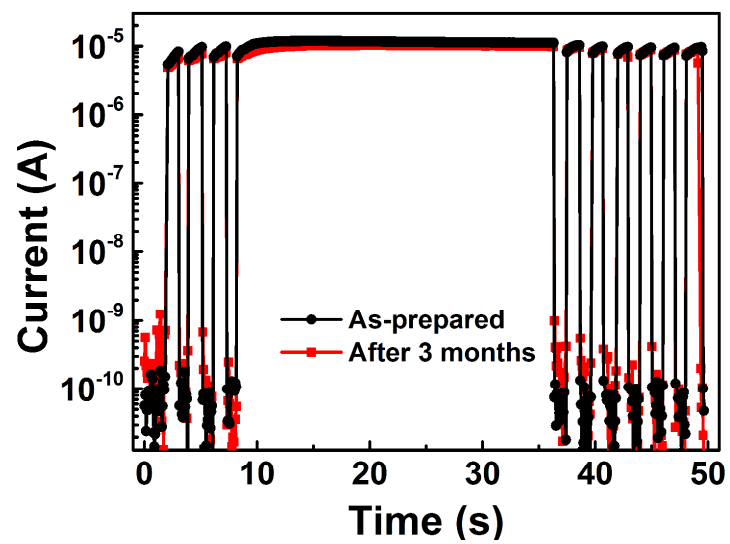

Figure S8 I-T curve of the device stored in the air after 3 months at 2 V.

Table S1 The performance parameters of perovskite-based PDs in this and previously reported

| work              |                                                                |                       |                                             |             |                 |            |
|-------------------|----------------------------------------------------------------|-----------------------|---------------------------------------------|-------------|-----------------|------------|
| Type              | Structure                                                      | Responsivity<br>(A/W) | Detectivity<br>( $\times 10^{12}$<br>Jones) | LDR<br>(dB) | On/off<br>ratio | References |
| Film              | FTO/MA <sub>0.7</sub> FA <sub>0.3</sub> PbBr <sub>3</sub> /FTO | 0.51                  | 4.0                                         | 100         | $\sim 10^5$     | This work  |
| Film              | ZnO/CsPbI <sub>3</sub> /P3HT                                   | 0.035                 | 1.8                                         | 85.6        | -               | 26         |
| Single<br>crystal | Ti/CH <sub>3</sub> NH <sub>3</sub> PbCl <sub>3</sub> /Pt       | $6 \times 10^4$       | 10                                          | -           | $\sim 100$      | 27         |
| Single<br>crystal | Au/CsPbBr <sub>3</sub> /Pt                                     | 0.028                 | 0.17                                        | -           | $10^5$          | 28         |
| nanowire          | Au/MAPbI <sub>3</sub> /Au                                      | 0.1                   | 1.02                                        | -           | $\sim 300$      | 29         |
| Film              | Pt/MAPbI <sub>3</sub> /Pt                                      | 0.175                 | 0.0967                                      | -           | $10^4$          | 30         |
| Single<br>crystal | Au/CsPbBr <sub>3</sub> /Au                                     | 0.028                 | 0.18                                        | -           | 100             | 31         |
